# Supplementary material for: Comparison of Two Bayesian Methods in Evaluation of the Absence of the Gold Standard Diagnostic Tests
Source: Biomed Res Int. 2019 Aug 21;2019:1374748. doi: 10.1155/2019/1374748 (PMC6720053; doi:10.1155/2019/1374748)
Supplement: Supplementary file — Table S1: origin dataset. [file 1374748.f4.xls]

## Sheet: BYE2R
ID	age	sex	TB_result	T_spot	KD38
149670	27	2	1	1	1
149642	41	1	1	1	1
154053	65	2	1	1	1
149802	25	1	1	1	0
136420	36	2	0	0	1
148146	23	2	1	0	0
148267	54	2	0	0	0
155099	63	2	1	1	1
155091	28	2	1	0	0
133198	64	1	1	1	1
156388	69	1	1	1	0
155490	29	2	1	1	0
156624	65	1	1	1	1
153712	25	1	1	0	0
149624	27	1	1	1	1
149649	65	1	1	1	1
149072	67	1	1	1	1
149113	44	1	1	1	1
153703	70	1	1	1	0
153554	69	1	0	0	0
149078	25	1	1	1	0
148973	24	2	1	1	1
149122	61	1	1	0	1
148162	29	1	1	1	0
155011	21	1	1	1	1
155072	47	2	1	1	1
155066	74	1	1	1	1
156010	55	1	1	1	1
155484	18	1	1	1	1
155476	53	1	1	1	1
155496	39	2	1	0	1
156569	75	2	1	1	1
156647	70	1	1	1	0
156668	74	1	1	1	0
156637	48	2	1	1	1
156622	17	1	1	1	0
156633	73	2	1	0	1
155487	46	1	1	1	1
155250	78	1	1	0	1
155480	68	1	0	0	1
155368	74	2	1	1	1
139447	42	1	1	1	1
139311	35	2	1	1	1
155274	39	2	1	0	1
155373	52	1	1	1	1
155491	68	2	1	1	0
155388	74	1	1	1	1
155358	77	1	1	1	1
156594	45	2	0	0	1
155428	62	1	0	1	0
155436	78	1	1	1	0
155362	20	2	0	0	0
80359	53	1	1	0	1
155419	48	1	1	1	1
156685	40	2	1	0	1
156265	68	2	1	0	0
156581	55	1	1	1	1
146330	36	2	1	1	0
145212	52	1	1	1	0
145286	72	1	1	0	0
145994	26	2	1	1	1
146477	88	2	0	0	0
146365	44	2	0	1	0
146962	82	1	0	1	0
146937	55		1	1	0
146828	71	1	0	1	1
146726	28	2	1	0	1
146665	24	2	1	1	1
147770	68	1	1	1	0
147714	25	2	1	0	0
147794	62	1	1	0	0
150787	67	1	1	1	1
150923	67	2	1	1	1
150865	57	1	1	1	1
150922	63	1	1	1	1
150875	69	1	0	1	0
151074	66	2	1	0	1
151053	27	1	0	0	0
151075	60	2	1	1	0
151038	34	2	1	1	0
152781	42	2	0	0	1
152846	53	1	1	1	0
150941	22	1	1	1	1
152100	52	1	1	1	0
153850	48	2	1	0	1
153627	44	1	1	1	0
153665	37	2	1	1	1
153677	53		0	0	0
153705	78	1	1	1	0
153670	58	1	0	0	0
149387	64	1	1	1	1
153756	38	2	1	1	1
149045	53	2	1	1	0
149001	73	1	0	0	0
153672	27	1	1	1	0
149628	69	1	0	0	1
148176	20	2	0	1	0
149031	68	2	1	0	1
153665	37	2	1	1	1
154017	64	1	1	1	1
98767	60	1	1	1	1
155008	76	1	1	1	1
154273	49	1	1	1	1
149665	82	1	1	0	0
153607	18	2	1	1	1
153634	84	1	0	1	0
149140	30	2	0	0	0
148252	47	1	1	1	1
149020	58	2	0	0	0
148605	80	1	0	0	0
149701	59	1	1	1	1
154903	43	1	1	1	1
154594	61	2	1	0	1
155382	61	1	1	0	0
145187	60	2	1	1	0
145217	75	2	0	0	1
139388	56	2	1	1	0
145133	80	1	1	0	1
145230	65	1	1	0	1
145156	32	2	1	1	1
145176	59	1	1	1	1
146419	87	1	1	1	0
145821	27	2	1	1	1
146457	15	2	1	0	0
146468	52	2	1	1	0
146443	50	2	0	0	0
146861	22	1	1	1	0
146461	59	1	1	0	0
146859	52	1	1	1	0
150166	42	2	1	1	1
150600	19	1	1	1	0
147391	63	1	1	1	1
147394	17	1	1	1	1
150412	62	1	1	0	0
150793	22	1	1	1	1
150830	64	1	1	1	1
152112	68	1	1	1	1
151070	53	1	0	1	1
151035	46	2	1	1	1
1510	46	2	1	1	1
152210	59	2	0	0	0
151090	33	1	1	1	1
152316	59	1	1	1	1
152191	25	1	1	0	1
152842	59	1	0	1	0
152887	68	2	1	0	1
153372	39	1	1	0	0
163675	51	2	1	1	0
1537	70	1	1	1	0
153558	63	2	1	0	0
149070	27	2	1	0	0
149015	53	2	0	0	0
149224	69	1	1	1	1
145251	54	2	1	1	1
155433	69	1	1	1	1
155794	61	1	1	0	0
156583	63	1	0	0	0
149192	86	1	1	1	0
156629	22	1	0	1	1
155466	34	2	1	1	1
149664	66	2	1	1	1
152991	34	2	1	1	1
149198	59	1	1	0	1
149643	63	1	1	1	0
148245	25	2	1	1	0
154326	73	1	0	0	1
148264	29	2	1	1	0
154125	46	2	1	1	1
148974	66	1	1	1	1
153620	23	2	1	0	0
154150	63	1	1	1	1
154144	36	1	1	1	0
156216	22	1	1	1	1
155340	54		1	1	0
155277	58	2	1	0	0
155500	25	1	1	0	1
156606	61	1	0	0	0
145098	64	1	1	1	0
145201	28	2	1	0	1
139307	74	2	1	1	1
144242	65	1	1	1	0
145192	71	2	1	1	1
139313	20	2	1	1	0
145223	51	1	0	1	1
145246	45	1	0	0	0
145198	69	1	0	0	1
145466	50	1	1	1	1
139456	68	1	0	1	1
146692	69	1	1	1	1
146804	68	2	1	1	0
146765	44	2	1	1	1
146683	26	2	1	1	1
146793	24	1	1	1	1
146932	51	1	0	1	0
147255	65	2	0	0	0
146727	64	2	0	0	0
147385	66	1	0	0	0
146796	59	2	0	0	0
149983	47	2	1	1	0
146682	49	1	0	1	0
147712	24	1	0	1	0
147774	24	1	1	1	1
147740	43	2	1	1	0
147766	27	2	1	1	1
150790	21	2	1	1	0
147824	26	1	0	1	0
147765	18	2	1	1	0
150917	67	1	0	0	0
150660	55	2	1	0	1
152041	79	2	0	1	0
152014	78	1	0	0	1
152603	82	1	1	1	1
150811	63	2	1	1	0
150951	61	1	1	1	1
150921	78	1	1	1	0
151017	63	2	1	1	0
151066	38	1	0	0	1
152109	33	2	1	1	1
153635	54	2	0	0	0
153620	23	1	1	0	0
153630	54	1	0	1	0
153756	38	2	1	1	1
153607	18	1	1	1	1
153634	84	1	0	1	0
149153	29	1	1	1	0
153627	44	1	1	1	0
148254	43	1	1	1	1
149052	73	1	1	0	0
139155	70	2	1	1	1
148601	69	1	1	1	0
153801	80	2	1	1	0
148150	21	1	1	0	1
149080	46	1	1	1	1
148255	65	1	1	1	0
148708	50	2	1	0	0
149223	24	2	1	1	0
149617	34	1	1	0	1
153832	37	2	0	0	0
153705	78	1	1	1	0
155047	30	2	1	1	1
155262	45	2	1	1	1
155358	77	1	0	1	1
155373	52	1	1	1	1
155436	78	1	1	1	0
155419	48	1	1	1	1
155362	20	2	0	0	0
155274	39	2	1	0	1
155174	35	2	1	1	0
155342	26	1	1	1	1
156265	68	2	1	0	0
155009	27	2	1	1	1
152729	37	2	1	1	0
156524	18	2	1	1	1
155223	42	2	1	1	1
120479	74	1	1	0	0
156207	61	1	1	1	1
155418	18	1	1	1	0
130094	44	1	1	1	0
155211	56	1	1	1	0
155336	69	1	1	1	1
155434	61	1	1	1	1
155278	26	1	1	0	0
155259	36	2	1	0	1
155179	43	1	1	1	1
139431	28	1	1	1	0
145169	60	1	1	1	1
145143	65	2	1	1	1
156929	56	1	1	1	0
156645	84	2	1	1	0
156635	31	2	1	1	1
155421	62	2	1	1	1
156598	71	2	1	1	0
156632	15	1	1	1	1
156927	37	2	1	0	1
156604	67	1	1	1	0
156653	64	2	1	1	0
155365	83	1	0	1	0
156079	59	1	1	0	0
156576	65	1	1	0	1
155268	29	1	1	0	1
156469	43	1	1	1	0
139497	67	2	0	1	0
139315	79	2	1	1	0
139378	20	1	1	0	0
139393	79	1	1	1	0
139487	47	1	0	0	0
145277	26	1	1	1	0
146788	28	1	0	0	0
146454	65	2	1	1	0
146992	68	1	1	1	1
147802	56	1	1	1	1
147806	65	1	1	1	0
147354	21	1	1	1	1
146773	28	1	1	1	0
147834	65	2	1	1	1
147817	26	2	1	1	1
147820	54	1	1	1	1
150414	76	1	1	1	1
147732	58	1	1	1	1
150915	72	1	1	1	1
150850	15	2	1	1	1
152114	58	1	1	1	1
152196	53	1	1	1	1
152120	85	2	1	1	1
152122	31	2	1	1	1
152089	18	2	1	1	1
152745	47	1	1	1	1
152176	28	1	0	1	0
152740	73	2	1	0	1
152060	20	1	1	1	1
152992	51	2	1	1	1
152924	90	1	0	1	0
153717	87	1	0	0	0
153636	17	1	1	1	0
153678	80	1	1	1	0
153549	43	1	1	1	1
153520	78	1	1	1	1
149665	82	1	0	0	0
153666	50	1	1	0	1
152952	60	2	1	1	1
153880	36	1	1	1	0
149615	66	2	1	1	0
149098	53	2	1	0	0
149070	27	2	1	1	0
107485	46	1	1	1	0
153635	54	2	0	0	0
149071	52	2	1	1	0
148721	26	1	1	1	0
153522	26	1	1	1	0
148222	38	2	1	1	0
148999	19	1	1	1	1
86871	54	1	1	1	1
154033	50	1	0	0	0
149941	64	2	1	1	0
154195	22	2	1	1	0
154455	38	2	1	1	1
154664	77	1	1	1	1
155363	66	1	1	1	1
155164	16	1	1	1	1
156589	67	2	1	0	1
156613	65	1	1	1	0
156892	64	1	1	1	1
145242	63	1	1	1	1
145282	60	2	0	1	0
156636	69	1	1	0	0
139384	20	1	1	1	1
139395	28	1	1	1	1
145281	69	2	0	0	0
139338	33	1	0	1	0
145986	73	1	0	0	0
145993	76	1	0	0	0
146961	80	1	0	1	0
146954	66	1	1	0	0
146950	68	1	1	0	1
147026	71	2	1	1	1
147136	67	1	1	0	0
146779	70	2	1	0	0
146744	55	1	1	1	1
146839	20	1	1	1	1
146721	58	1	1	1	0
146923	49	1	1	1	0
147652	38		1	1	0
146831	60	1	1	0	1
147818	32	2	1	1	0
147432	87	1	0	1	0
150220	58	1	1	1	0
150285	22	1	1	1	1
150349	52	2	1	1	0
150500	62	1	0	0	0
147771	66	1	1	1	0
150394	67	2	1	0	0
150340	52	1	1	1	1
150312	61	2	1	1	0
150330	59	2	1	0	0
150884	50	1	1	1	1
150809	16	1	1	0	0
150345	43	1	1	0	0
150819	27	2	0	1	0
150902	57	2	1	1	0
150811	63	2	1	1	0
152111	53	2	1	1	0
151014	20	1	1	1	1
152831	84	1	1	1	1
152959	48	2	0	0	0
152217	41	1	0	0	0
152933	58	2	0	0	0
152222	66	2	1	1	1
152265	79	2	0	1	1
152257	48	1	1	1	0
152723	63	1	1	0	1
152974	44	2	1	1	1
152067	75	2	1	0	1
152069	27	1	1	1	1
153538	66	1	1	1	0
153529	73	1	1	1	1
153682	19	1	1	1	1
153591	53	1	1	0	1
153540	37	1	1	1	0
153712	25	1	1	0	0
149029	68	1	1	0	1
149001	73	1	0	0	0
149078	25	1	1	1	0
149153	29	1	1	0	0
148980	65	1	0	0	0
154459	57	2	1	0	1
148994	21	1	1	0	1
154634	22	1	1	1	0
155105	27	2	1	1	0
155153	25	1	1	0	1
154639	51	2	1	0	0
154879	46	2	0	0	1
156656	47	1	0	0	0
155252	56	1	0	0	0
156587	71	1	1	1	0
145104	53	1	1	1	0
145111	65	2	1	0	0
155174	35	2	1	1	0
155286	27	2	1	1	0
155424	67	2	1	0	0
155474	70	1	0	0	0
156649	67	1	1	1	0
139459	73	2	1	1	0
147405	66	1	1	1	1
146694	29	1	1	0	1
146862	29	1	1	1	1
146798	77	2	1	1	1
146784	50	1	0	0	0
147257	60	2	0	1	0
146685	48	1	1	1	1
146860	61	2	1	1	1
146964	60	1	1	1	1
150712	71	1	0	1	1
147838	50	2	1	0	1
150280	64	1	1	1	1
147769	61	1	0	0	1
147751	39	1	1	1	1
147813	71	1	1	0	0
147807	48	2	0	0	0
147772	25	2	0	1	0
147823	26	1	1	1	1
150254	44	2	1	1	1
150341	23	2	1	1	1
150231	19	1	1	1	0
150846	69	1	1	1	0
152223	27	1	0	0	0
151919	48	2	1	1	0
150871	52	1	1	1	0
150884	50	1	1	1	1
152087	46	1	1	0	1
152062	60	2	1	1	0
151029	51	1	1	0	0
152256	71	2	1	1	0
152923	20	2	1	1	1
152911	82	1	1	1	0
152927	70	1	0	0	0
152868	50	2	1	1	1
152250	61	1	1	1	0
153631	50	1	1	1	0
153757	64	2	1	0	1
153689	68	1	1	0	0
153541	23	2	1	0	1
153697	68	2	1	1	1
153602	53	2	1	0	0
153691	61	1	0	0	0
149636	32	1	1	0	0
149031	68	2	0	0	1
149617	34	1	1	0	1
149606	51	2	0	0	1
149620	52	2	1	1	0
149052	73	1	0	0	0
149008	59	1	1	1	0
154237	55	1	1	1	1
153682	19	1	1	1	1
152726	45	2	1	1	0
153630	54	1	1	1	0
149194	49	1	1	1	1
148259	18	1	1	1	0
126075	73	2	1	1	0
148979	16	2	1	1	1
154897	28	1	1	0	0
149003	25	1	1	0	0
149040	72	1	1	0	1
149054	28	1	1	1	1
155069	53	2	1	1	1
155016	58	2	1	1	1
154173	51	1	1	1	1
154490	29	1	1	1	0
155010	27	1	1	0	1
154919	72	1	1	1	1
80408	53	1	1	0	1
155297	35	1	0	1	0
155268	29	1	1	0	1
155077	16	2	1	1	1
155400	47	1	1	1	1
155390	62	1	1	1	0
109289	67	1	1	0	1
155150	35	2	1	0	0
156691	63	1	1	0	1
153294	59	2	1	1	1
156382	57	1	1	1	1
154237	56	1	1	1	1
145196	60	1	0	1	0
145096	29	2	1	1	1
145058	37	1	1	1	1
145019	62	2	1	1	1
139260	70	2	1	0	1
146365	44	2	1	1	0
139447	42	1	1	1	1
146939	58	1	1	0	1
146717	21	1	1	1	1
146824	27	1	1	1	1
146366	25	1	1	1	0
145565	21	1	1	1	0
147732	36	2	1	0	1
147409	53	1	1	1	1
147349	89	1	1	1	1
147104	60	2	1	0	1
147687	70	1	1	1	1
147437	36	2	1	1	1
144752	78	2	1	0	0
150165	81	1	1	1	0
147371	38	1	1	0	1
147388	21	2	1	1	1
147342	36	2	1	0	1
151917	23	2	1	0	0
150403	63	1	1	0	1
150977	31	2	1	1	0
150408	59	2	1	1	1
152040	63	2	1	1	0
152352	87	2	1	1	0
152201	62	1	1	0	0
152101	24	1	1	1	1
152225	62	1	1	1	1
152127	25	1	1	0	0
153614	67	1	1	0	1
152810	80	1	1	1	1
152886	61	1	1	1	1
152739	23	1	1	1	0
152093	50	2	1	1	0
153059	24	1	1	1	1
153679	74	1	1	0	0
153521	42	1	1	1	0
153629	23	1	1	1	1
153695	49	2	1	0	1
153622	29	1	1	1	1
153522	26	1	1	1	0
153850	48	2	1	0	1
149616	61	1	1	1	1
149387	64	1	1	1	1
148268	76	1	1	1	1
154816	22	1	1	1	0
155197	69	2	1	0	1
155219	57	2	1	1	0
155428	62	1	1	1	0
155286	27	2	1	1	0
155388	74	1	1	1	1
154911	43	2	1	1	1
155474	70	1	1	0	0
155424	67	2	1	0	0
155431	48	1	1	1	1
155423	17	2	0	0	0
156577	16	1	0	0	0
155382	61	1	0	0	0
155342	26	1	0	1	1
139097	79	1	1	0	1
139375	68	1	1	0	0
145258	57	1	1	1	0
145229	23	2	1	1	0
147649	39	1	1	0	0
147406	33	1	1	0	0
147253	47	1	1	0	0
139457	63	1	1	1	1
146714	45	1	1	1	1
146736	70	2	1	1	0
146713	79	1	1	1	0
147932	19	2	1	1	0
147776	80	1	1	1	1
146865	58	1	1	1	0
146973	50	2	1	1	1
147755	25	1	1	1	0
151701	46	2	1	0	0
150406	43	1	1	0	0
150795	36	1	1	1	0
150352	30	1	1	0	0
152264	79	1	1	0	0
152212	44	2	1	0	0
152060	20	1	1	1	1
152088	65	1	1	1	0
152739	23	1	1	1	0
152912	15	1	1	0	0
152909	67	1	1	0	0
152931	50	2	1	1	1
152270	28	2	1	1	1
152783	62	2	1	1	1
152737	66	1	1	0	0
153713	50	2	1	0	0
153706	68	1	1	0	0
152869	25	1	1	1	1
149664	66	2	1	1	1
149619	45	2	1	1	1
149112	40	2	0	0	1
149190	44	1	0	0	1
149224	69	1	1	1	1
148991	77	1	1	0	0
149011	47	2	1	0	1
149187	65	1	1	1	0
140714	67	1	0	0	0
148961	31	2	0	0	0
149057	41	1	0	0	1
148275	50	2	0	0	0
148300	67	1	1	1	0
154590	31	1	1	1	1
154224	23	1	1	1	1
155014	71	1	1	1	1
154161	48	1	1	1	0
156079	59	1	1	0	0
155351	23	2	1	1	0
155215	37	1	1	0	0
156212	47	1	1	1	1
147079	29	2	1	1	0
155110	18	1	1	1	1
139461	25	2	1	1	1
139095	49	2	1	1	1
139309	49	1	1	1	0
139462	54	1	1	1	1
146751	34	2	1	1	0
146785	62	1	1	0	0
146695	66	1	0	0	0
146754	58	1	1	1	1
147822	33	2	1	1	1
147344	18	2	1	1	0
152104	59	2	1	1	1
152128	27	1	1	1	0
152726	45	2	1	1	0
152651	50	2	1	1	0
152101	24	2	1	1	1
152127	25	1	1	0	0
